# Supplementary material
Source: PubMed Central journal article supplement (PMC4414867)
Supplement: NIHMS669032-supplement-2.pdf [file NIHMS669032-supplement-2.pdf]

Supplementary Table 1. WES variants in CBA patients with known causative genes.

| Family ID | Chromosome | Position  | Reference | Mutant  | Gene        | Effect on protein | dbSNP       | AA_Charge | AA_Pos    | AF     | consScoreGERP | In Homozygous Interval ? |
|-----------|------------|-----------|-----------|---------|-------------|-------------------|-------------|-----------|-----------|--------|---------------|--------------------------|
| 760       | 23         | 107148774 | G         | A       | MID2        | missense          |             | VAL/ILE   | 331/706   | 0.0014 | 5.35          |                          |
|           | 23         | 53574861  | G         | A       | HUWE1       | missense          |             | SER/LEU   | 3470/4375 | 0.0005 | 5.3           | +                        |
|           | 23         | 20193290  | T         | C       | RPS6KA3     | missense          |             | ILE/VAL   | 407/741   | 0.0005 | 5.14          |                          |
| 1074      | 14         | 68220462  | C         | T       | ZFYVE26     | missense          |             | VAL/ILE   | 2384/2540 | 0.001  | 4.86          | +                        |
| 1091      | 9          | 135147123 | TCTGACA   | T       | SETX        | coding            |             |           |           | 0.0007 | 5.45          | +                        |
|           | 23         | 105193709 | A         | G       | NRK         | missense          |             | ASP/GLY   | 1499/1583 | 0.0007 | 5.41          |                          |
|           | 23         | 102978859 | G         | A       | GLRA4       | missense          |             | LEU/PHE   | 168/418   | 0.0007 | 5.11          | +                        |
|           | 23         | 11157261  | G         | A       | ARHGAP6     | missense          |             | PRO/SER   | 883/975   | 0.0007 | 4.77          |                          |
|           | 2          | 215657132 | C         | A       | BARD1       | missense          |             | VAL/LEU   | 85/778    | 0.0017 | 5.24          | +                        |
| 1092      | 10         | 81058854  | G         | A       | ZMIZ1       | missense          |             | VAL/MET   | 572/1068  | 0.0005 | 5.17          |                          |
|           | 5          | 14461395  | C         | T       | TRIO        | missense          |             | THR/ILE   | 1824/3098 | 0.0005 | 5             |                          |
|           | 9          | 37783990  | T         | G       | EXOSC3      | missense          |             | ASP/ALA   | 132/165   | 0.0005 | 5.29          |                          |
|           | 4          | 16504387  | A         | C       | LDB2        | missense          |             | MET/ARG   | 334/374   | 0.0005 | 5.27          |                          |
|           | 9          | 13121877  | T         | C       | MPDZ        | missense          |             | ARG/GLY   | 1698/2042 | 0.0005 | 4.59          |                          |
| 1719      | 8          | 90937720  | ATTTG     | A       | OSGIN2      | frameshift        |             |           |           | 0.0016 | 5.44          |                          |
|           | 4          | 25146422  | A         | G       | SEPSECS     | missense          |             | TYR/HIS   | 334/502   | 0.0009 | 5.2           |                          |
|           | 12         | 51584196  | T         | C       | POU6F1      | missense          |             | GLU/GLY   | 247/302   | 0.0009 | 4.26          | +                        |
|           | 4          | 22750572  | A         | G       | GBA3        | missense          |             | GLU/GLY   | 399/470   | 0.0009 | 5.96          |                          |
|           | 20         | 4768278   | C         | T       | RASSF2      | splice-5          |             |           |           | 0.0003 | 5.41          | +                        |
|           | 4          | 169195105 | C         | T       | DDX60       | missense          |             | VAL/MET   | 812/1713  | 0.0003 | 4.98          |                          |
|           | 6          | 168910650 | C         | T       | SMOC2       | missense          |             | SER/LEU   | 47/458    | 0.0005 | 4.82          | +                        |
| 9         | 128246853  | G         | T         | MAPKAP1 | missense    |                   | ALA/GLU     | 359/523   | 0.0003    | 5.26   | +             |                          |
| 2029      | 2          | 231988281 | T         | C       | HTR2B,PSMD1 | missense          |             | ILE/MET   | 66/482    | 0.001  | -0.677        |                          |
|           | 18         | 21131657  | G         | A       | NPC1        | missense          |             | HIS/TYR   | 530/1279  | 0.001  | 5.58          |                          |
| 2088      | 17         | 73945964  | CT        | C       | ACOX1       | frameshift        |             |           |           | 0.0007 | 4.83          | +                        |
| 1898      | 15         | 43819181  | C         | T       | MAP1A       | missense          | rs185524761 | SER/LEU   | 1837/2804 | 0.0003 | 4.59          | +                        |
|           | 20         | 49348331  | G         | A       | PARD6B      | missense          |             | ARG/HIS   | 3/373     | 0.0005 | 4.28          |                          |
|           | 15         | 43022061  | A         | G       | CDAN1       | missense          | rs141931755 | LEU/SER   | 762/1228  | 0.0003 | 5.49          | +                        |
|           | 19         | 36558255  | CCT       | C       | WDR62       | frameshift        |             |           |           | 0.001  | 5.08          |                          |
|           | 15         | 42459731  | C         | T       | VPS39       | missense          |             | ARG/GLN   | 413/876   | 0.0003 | 6.04          | +                        |
| 1533      | 4          | 94137980  | TAA       | T       | GRID2       | frameshift        |             |           |           | 0.0007 | 4.43          |                          |
| 1373      | 7          | 87135241  | G         | A       | ABCB1       | missense          |             | THR/MET   | 1203/1281 | 0.001  | 5.59          |                          |
|           | 18         | 59780510  | C         | T       | PIGN        | missense          |             | GLY/ARG   | 431/932   | 0.0007 | 5.16          | +                        |
|           | 7          | 100371066 | G         | A       | ZAN         | missense          |             | VAL/MET   | 1862/2722 | 0.0007 | 4.63          | +                        |
| 2477      | 15         | 68504102  | CAG       | C       | CLN6        | frameshift        |             |           |           | 0.0005 | 5.14          | +                        |
|           | 7          | 98554070  | G         | A       | TRRAP       | missense          |             | VAL/ILE   | 2024/3831 | 0.0014 | 4.29          | +                        |
|           | 12         | 10124287  | G         | A       | CLEC12A     | splice-5          |             |           |           | 0.0016 | 4.07          | +                        |
|           | 7          | 101267498 | T         | C       | MYL10       | missense          |             | ASN/SER   | 42/227    | 0.0014 | 4.27          | +                        |
| 1679      | 18         | 19996290  | C         | T       | CTAGE1      | stop-gained       |             | TRP/stop  | 495/746   | 0.0005 | -1.23         |                          |
|           | 11         | 66468197  | G         | A       | SPTBN2      | stop-gained       |             | ARG/stop  | 1125/2391 | 0.0003 | 3.75          |                          |
|           | 4          | 83774785  | C         | A       | SEC31A      | missense          |             | VAL/LEU   | 659/1182  | 0.0003 | 5.04          |                          |
|           | 19         | 4054825   | C         | G       | ZBTB7A      | missense          | rs147200385 | ALA/PRO   | 136/585   | 0.0003 | 4.9           |                          |
|           | 23         | 70680560  | A         | G       | TAF1        | missense          | rs147517498 | ASN/SER   | 1789/1894 | 0.0007 | 4.9           | +                        |
|           | 6          | 130413962 | G         | A       | L3MBTL3     | missense          |             | GLY/SER   | 531/781   | 0.0003 | 5.42          |                          |
|           | 3          | 16636084  | G         | A       | DAZL        | missense          |             | PRO/SER   | 213/316   | 0.0005 | 6.02          |                          |
|           | 6          | 129963054 | T         | C       | ARHGAP18    | missense          |             | MET/VAL   | 75/664    | 0.0003 | 4.72          |                          |
| 23        | 138827937  | A         | G         | ATP11C  | missense    |                   | PHE/LEU     | 973/1133  | 0.0003    | 5.97   |               |                          |
| 7         | 155295771  | C         | T         | CNPY1   | missense    |                   | GLU/LYS     | 91/93     | 0.0003    | 4.46   |               |                          |

Causative candidates in red compared with other variants (in black) found in each family. Other variants passing criteria are listed for each family. Columns 1 Family number, 2 Chromosome number, 3 Position in hg19, 4 Reference base, 5 Mutant base, 6 Gene name, 7 Functional outcome predicted by Genome Variant Server (GVS), 8 dbSNP reference ID if exists, 9 Amino acid change, 10 Amino acid position, 11 Allele frequency (AF) with our in-house 4000 exome database, 12 GERP conservation score, 13 in homozygous interval within the exome sequence data.

**Supplementary Table 2. Mutations in SNX14 identified in this study and method of mutation.**

| Family ID | Position (hg19)          | Nucleotide Change     | Deduced protein change | Effect on protein | Gene identification | Accession   |
|-----------|--------------------------|-----------------------|------------------------|-------------------|---------------------|-------------|
| 1410      | chr6:86277285 A>T        | c.428T>A              | p.Leu143*              | stop-gained       | WES                 | NM_153816.3 |
| 2935      | chr6:82359586 A>AA       | c.645dupA             | p.Glu216Argfs*25       | frameshift        | Sanger              | NM_153816.3 |
| 3423      |                          |                       |                        |                   | Sanger              | NM_153816.3 |
| 1902      | chr6:86258072 CTCTTA>C   | c.809_813delTAAGA     | p.Ile270Argfs*17       | frameshift        | WES                 | NM_153816.3 |
| 3087      | chr6:86257219 C>T        | c.912+5G>A            | -                      | splice            | Sanger              | NM_153816.3 |
| 468       | chr6:86253455 G>A        | c.1132C>T             | p.Arg378*              | stop-gained       | WES                 | NM_153816.3 |
| 525       |                          |                       |                        |                   | WES                 | NM_153816.3 |
| ABD       |                          |                       |                        |                   | WES                 | NM_153816.3 |
| 2892      |                          |                       |                        |                   | WES                 | NM_153816.3 |
| 1382      | chr6:86253404 TC>T       | c.1182delG            | p.Lys395Argfs*22       | frameshift        | WES                 | NM_153816.3 |
| 1971      | chr6:86216982 ACAATGTC>A | c.2764_2770delGACATTG | p.Asp922*              | stop-gained       | WES                 | NM_153816.3 |
| HMF       | chr6:86,217,761 AC>C     | c.2670delT            | p.Cys890*              | stop-gained       | WES                 | NM_153816.3 |

Columns 1 Family number, 2 Position in hg19, 3 Nucleotide change in cDNA, 4 Protein change, 5 Functional outcome predicted by Genome Variant Server (GVS), 6 Gene identification method (Whole Exome Sequencing (WES) or Sanger sequencing), 7 RefSeq Accession Number.

Supplementary Table 3. WES variants in SNX14 mutated families.

| Family ID | Chromosome | Position  | Reference                            | Mutant | Gene                | Effect on protein | dbSNP       | AA_Charge    | AA_Pos    | AF     | consScoreGERP | In Homozygous Interval ? |
|-----------|------------|-----------|--------------------------------------|--------|---------------------|-------------------|-------------|--------------|-----------|--------|---------------|--------------------------|
| 468       | 6          | 86253455  | G                                    | A      | SNX14               | stop-gained       |             | ARG/stop     | 378/947   | 0.0011 | 1.6           | +                        |
|           | 10         | 11374574  | CTCCAGTCTTCTCTTCGGCATGCCCTGGAAGCTTCT | C      | CELF2               | splice-5          | rs76081927  | N/A          |           | 0.0073 | 4.06          |                          |
| 1382      | 6          | 86253404  | TC                                   | T      | SNX14               | frameshift        |             | LYS/ARGfs*22 | 395/947   | 0.001  | N/A           | +                        |
|           | 19         | 33183410  | T                                    | G      | NUDT19,LOC100288796 | missense          |             | CYS/GLY      | 182/376   | 0.0059 | 4.36          |                          |
|           | 16         | 48121987  | G                                    | A      | ABCC12              | missense          |             | SER/LEU      | 1162/1360 | 0.0027 | 4.68          |                          |
|           | 14         | 23996935  | C                                    | T      | ZFHX2               | missense          |             | VAL/MET      | 1027/2707 | 0.0022 | 4.33          |                          |
|           | 13         | 96553101  | T                                    | C      | UGGT2               | missense          | rs35060832  | LYS/ARG      | 865/1517  | 0.0063 | 4.25          | +                        |
|           | 7          | 2581807   | A                                    | C      | BRAT1               | missense          |             | LEU/ARG      | 321/822   | 0.0057 | 4.96          |                          |
|           | 6          | 87965700  | A                                    | G      | ZNF292              | missense          |             | LYS/GLU      | 785/2724  | 0.001  | 5.41          | +                        |
|           | 6          | 84567062  | A                                    | G      | RIPPLY2             | missense          |             | ASP/GLY      | 114/129   | 0.001  | 5.17          | +                        |
|           | 1          | 45190324  | C                                    | G      | C1orf228            | missense          |             | ALA/GLY      | 345/441   | 0.0029 | 4.28          |                          |
|           | 1          | 15429903  | G                                    | A      | KAZ                 | missense          |             | VAL/MET      | 610/776   | 0.0017 | 5.06          |                          |
| 1410      | 6          | 86277285  | A                                    | T      | SNX14               | stop-gained       |             | LEU/stop     | 143/947   | 0.0003 | N/A           | +                        |
| 1902      | 6          | 86258072  | CTCTTA                               | C      | SNX14               | frameshift        |             | ILE/ARGfs*17 | 270/947   | 0.0003 | N/A           | +                        |
|           | 9          | 90313595  | C                                    | T      | DAPK1               | missense          |             | PRO/LEU      | 879/1431  | 0.0003 | 5.2           |                          |
|           | 6          | 43607930  | A                                    | G      | MAD2L1BP            | missense          |             | LYS/ARG      | 194/307   | 0.0003 | 5.73          | +                        |
|           | 6          | 43607930  | A                                    | G      | MAD2L1BP            | missense          |             | LYS/ARG      | 162/275   | 0.0003 | 5.73          | +                        |
| 1971      | 23         | 154010044 | T                                    | G      | MPP1                | missense          |             | ASP/ALA      | 327/467   | 0.0006 | 5.39          | +                        |
|           | 6          | 86216982  | ACAATGTC                             | A      | SNX14               | frameshift        |             | ASP/stop     | 922/947   | 0.0006 | N/A           | +                        |
| 2892      | 1          | 20680261  | GCTGGCCTCCGGAGC                      | G      | VWA5B1              | frameshift        |             | ARG/PROfs*7  | 1053/1216 | 0.0005 |               | +                        |
|           | 23         | 154059045 | C                                    | A      | CXorf68             | missense          | rs184141613 | LEU/PHE      | 29/100    | 0.0014 |               | +                        |
|           | 6          | 86253455  | G                                    | A      | SNX14               | stop-gained       |             | ARG/stop     | 378/947   | 0.0015 | 1.23          | +                        |

Mutations in SNX14 in red identified in this study compared with other variants found in each family. Other variants passing criteria are listed for each family. Columns 1 Family number, 2 Chromosome number, 3 Position in hg19, 4 Reference base, 5 Mutant base, 6 Gene name, 7 Functional outcome predicted by Genome Variant Server (GVS), 8 dbSNP reference ID if exists, 9 Amino acid change, 10 Amino acid position, 11 Allele frequency (AF) with our in-house 4000 exome database, 12 GERP conservation score, 13 in homozygous interval within the exome sequence data.

**Supplementary Note**

The two older affected members of family 1382 were subject to comprehensive analysis of lysosomal enzyme function, all of which were normal. These included the following: beta-galactosidase, beta-mannosidase, alpha-L-fucosidase, alpha-mannosidase, beta-glucuronidase, beta-hexosaminidase A, arylsulfatase A, galactocerebrosidase, sphingomyelinase, glucocerebrosidase, alpha-L-iduronidase, sialidase, arylsulfatase B, alpha-galactosidase, alpha-glucosaminidase, beta-hexosaminidase, and acid lipase. The glycosaminoglycans were elevated in urine for age at 32 mg/mmol creatinine (reference for age is less than or equal to 10 mg/mmol creatinine), but two dimensional electrophoretic separation of GAGs from urine shows a normal pattern. Very long chain fatty acids and phytanic acids were normal in plasma.
